# Supplementary material for: Clinical utility of circulating pneumoproteins as diagnostic biomarkers in COVID-19: a systematic review and meta-analysis
Source: Research Square preprint supplement (doi:10.21203/rs.3.rs-1311292/v1), 2022-01-31
Supplement: Supplementary file 1 [file f0fc9ade1b59e4829b676c52.docx]

| Outcome | Participants (studies) | Risk of bias | Inconsistency | Indirectness | Imprecision | Other considerations | Overall certainty of evidence |
| --- | --- | --- | --- | --- | --- | --- | --- |
| KL-6 | 16 observational studies | Serious1 | Serious2 | Not serious | Not serious | Plausible confounding3 |  VERY LOW |
| SP-D | 10 observational studies | Serious1 | Serious2 | Not serious | Not serious | Plausible confounding3 |  VERY LOW |
| SP-A | 5 observational studies | Serious1 | Serious2 | Not serious | Not serious | Plausible confounding3 |  VERY LOW |
| RAGEs | 5 observational studies | Serious1 | Serious2 | Not serious | Not serious | Plausible confounding3 |  VERY LOW |

**1Serious risk of bias due to the NOS score (5-6)**

**2Serious inconsistency due to significant heterogeneity (I2＞50%)**

**3all plausible residual confounding would reduce the demonstrated effect. Some of the studies do not match the basic information of two groups, like age, sex ratio and so on.**
